# Supplementary material for: Dynamic tuning of metal–ligand coordination through water molecules to induce multicolor fluorescence variations for humidity monitoring and anti-counterfeiting applications
Source: Royal Society of Chemistry journal article supplement (doi:10.1039/d1tc00487e), 2021-01-01
Supplement: d1tc00487e3.pdf [file d1tc00487e3.pdf]

## Electronic Supplementary Information

Dynamic tuning of metal-ligand coordination through water molecules to induce multicolor fluorescence variations for humidity monitoring and anti-counterfeiting applications

Juan Wei,<sup>a</sup> Yun Ma,<sup>\*a</sup> Chenyuan Liu,<sup>a</sup> Jiangang Li,<sup>a</sup> Jiandong Shen,<sup>a</sup> Kenneth Yin Zhang<sup>a</sup>,  
Shujuan Liu,<sup>a</sup> Qiang Zhao<sup>\*a</sup>

## Experimental

### Materials and Measurements

All starting materials and reagents were acquired commercially and used without further purification.  $^1\text{H}$  NMR (400 MHz) spectrum was recorded on a Bruker ACF400 spectrometer at 298 K using deuterated solvents. Mass spectra were recorded on a Bruker autoflex MALDI-TOF MS. Fluorescence spectral changes of polymer films upon changing RHs were measured with an Edinburgh Instrument FLS980 combined fluorescence lifetime and steady state spectrophotometer that was equipped with a red-sensitive single-photon counting photomultiplier in Peltier Cooled Housing.

### Synthesis of BPPA

In nitrogen atmosphere,  $\text{Pd}(\text{PPh}_3)_4$  (80.7 mg, 0.07 mmol) was added into the mixture of (4-(diphenylamino) phenyl) boronic acid (1 g, 3.5 mmol) and 4,4'-dibromo-2,2'-bipyridine (434 mg, 1.4 mmol) and 2.7 mg  $\text{K}_2\text{CO}_3$  and THF (50 mL). The reaction was at  $65^\circ\text{C}$  for 40 h. The product was purified through column chromatography, yield 64%.  $^1\text{H}$  NMR (400 MHz,  $\text{CD}_3\text{Cl}$ )  $\delta$  (ppm): 9.16 (s, 2H), 8.80 (d,  $J = 4.0$  Hz, 2H), 7.9 (d,  $J = 8.0$  Hz, 4H), 7.81 (d,  $J = 4.0$  Hz, 2H), 7.7 (m, 2H), 7.58 (m, 2H), 7.49 (m, 2H), 7.35 (t,  $J = 16.0$  Hz, 6H), 7.21 (m, 12H). [m/z]: (calculated, 642.79, found, 642.29).

### Fabrication of thin films

PEG8000 (1.8 g) was dissolved in  $\text{CH}_2\text{Cl}_2$  (100 mg/mL). Then, BPPA (10 mg) and  $\text{Zn}(\text{ClO}_4)_2 \cdot 6\text{H}_2\text{O}$  (5.8 mg) were mixed and dissolved in  $\text{CH}_2\text{Cl}_2$  ( $1 \times 10^{-3}$  mol/L). Various emission color solutions can be obtained by doping the above two solution at a certain mass ratios. The glass slides were treated under UV light for 30 minutes. The films were prepared by spin coating with 45  $\mu\text{L}$  doped solution at speed of 3000 r/min.

### Humidity environment and determine the RHs

Concentrated  $\text{H}_2\text{SO}_4$  (98%) and saturated salt aqueous solution (KBr) were used to establish a humidity environment and electronic hygrometer was employed to determine the RHs. By preparation the mixture with different proportion of  $\text{H}_2\text{SO}_4$  and saturated salt aqueous solution according to the below table, different RHs can be obtained after sealing the container for 3 days.

**Table S1:** Proportion of prepared solution

| RH (%)                            | 18   | 32 | 47 | 65 | 72   | 88  | 95 |
|-----------------------------------|------|----|----|----|------|-----|----|
| $\text{H}_2\text{SO}_4/\text{mL}$ | 50   | 34 | 25 | 17 | 13.4 | 5.4 | 0  |
| $\text{H}_2\text{O}/\text{mL}$    | 47.5 | 50 | 50 | 50 | 50   | 50  | 50 |

RH (80%): 50mL saturated KBr solution.

### Reversibility experiment.

For the reversibility experiment, the prepared film was first placed in 18% RH for 2h before the measurement of PL spectrum. After that, this film was placed in 88% RH for another 2h before next PL emission recording. In this experiment, above-mentioned procedure was repeated for 10 times. The release and uptake water in the prepared film was autonomically occurred under different environment.

## Additional Figures

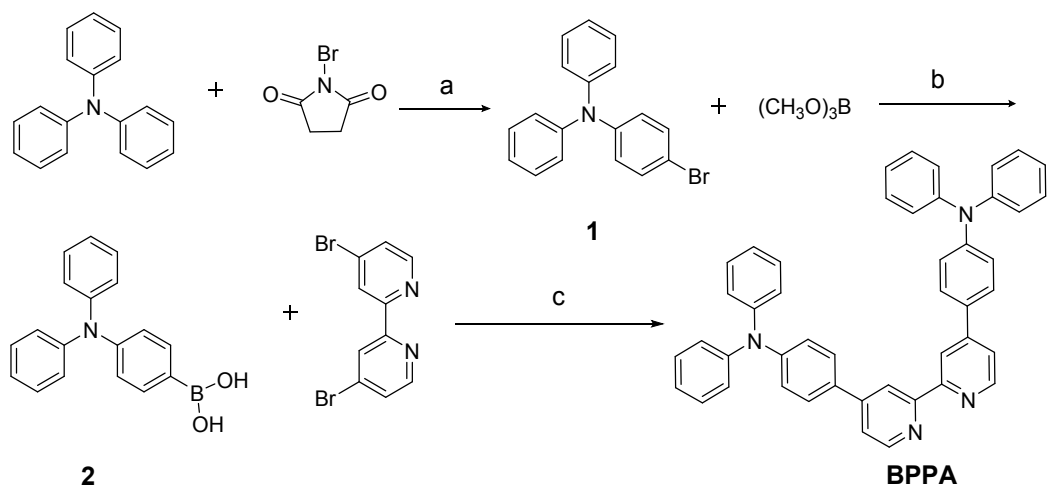

**Fig. S1** Synthetic route of ligand BPPA. Reagents and conditions: (a) trichloromethane, 0 °C, 2 h, 25 °C, 12 h, 96%; (b) N<sub>2</sub> atmosphere, THF, n-BuLi, -78 °C, 1 h, 25 °C, 12 h, 96%; (c) N<sub>2</sub> atmosphere, V<sub>PhMe</sub> : V<sub>EtOH</sub> : V<sub>water</sub> = 3 : 1 : 1, 65 °C, 40 h, 55%.

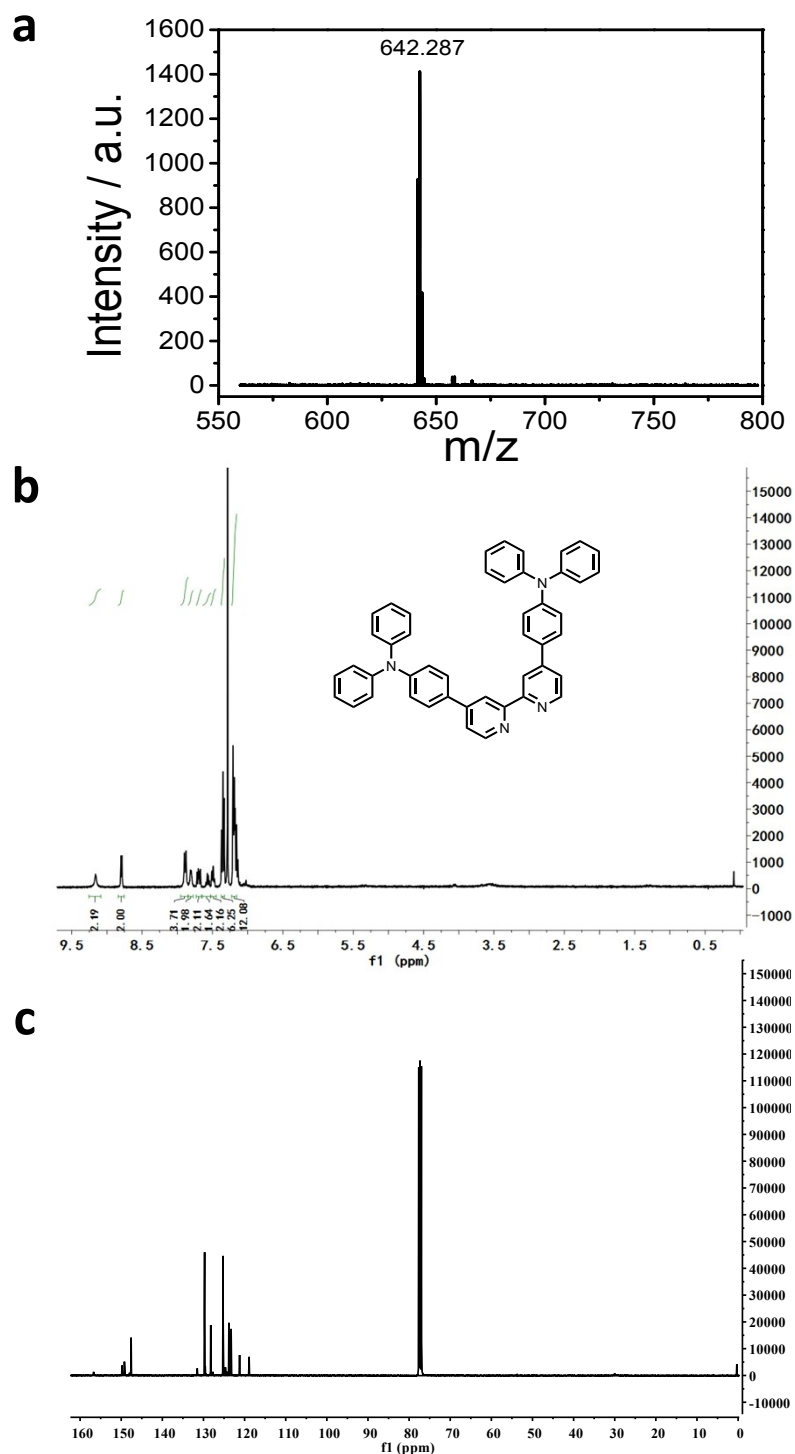

**Fig. S2** (a) MALDI-TOF MS. [m/z]: (calculated, 642.79, found, 642.29). (b)  $^1\text{H}$  NMR (400 MHz)  $^1\text{H}$  NMR (400 MHz,  $\text{CD}_3\text{Cl}$ )  $\delta$  (ppm): 9.16 (s, 2H), 8.80 (d,  $J = 4.0$  Hz, 2H), 7.9 (d,  $J = 8.0$  Hz, 4H), 7.81 (d,  $J = 4.0$  Hz, 2H), 7.7 (m, 2H), 7.58 (m, 2H), 7.49 (m, 2H), 7.35 (t,  $J = 16.0$  Hz, 6H), 7.21 (m, 12H). (c)  $^{13}\text{C}$  NMR (100 MHz, (chloroform- $d$ ,  $25^\circ\text{C}$ , TMS):  $\delta = 156.71, 149.59, 149.23, 148.04, 147.59, 131.60, 129.72, 128.23, 17.78, 125.78, 125.22, 124.49, 124.37, 123.82, 123.27, 121.22, 118.89$ .

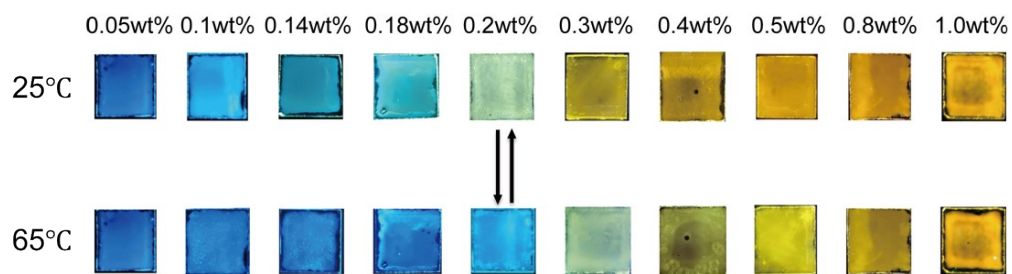

**Fig. S3** PL photographs of Zn-BPPA in PEG films at different concentrations (0.05 to 1.0 wt%) upon heating to 65 °C (excitation at 365 nm).

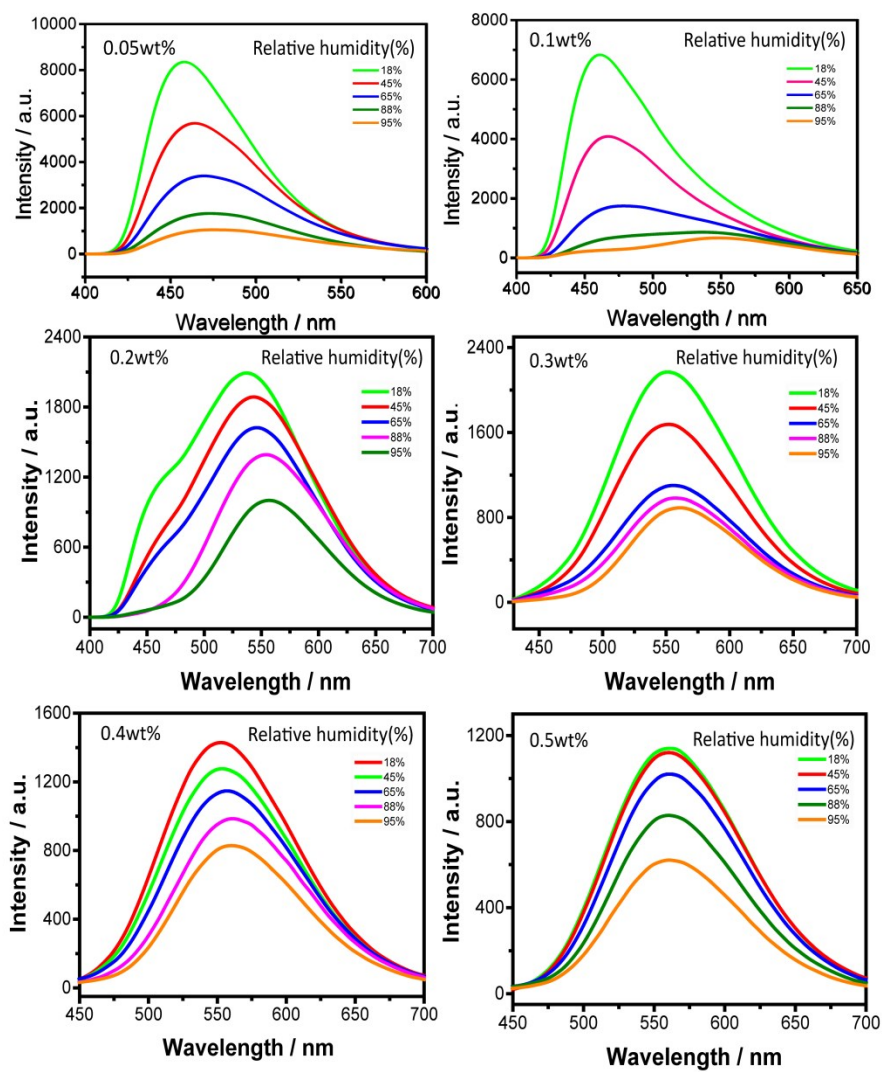

**Fig. S4** The PL spectra of thin films with different mass ratios of Zn-BPPA/PEG under different RHs.

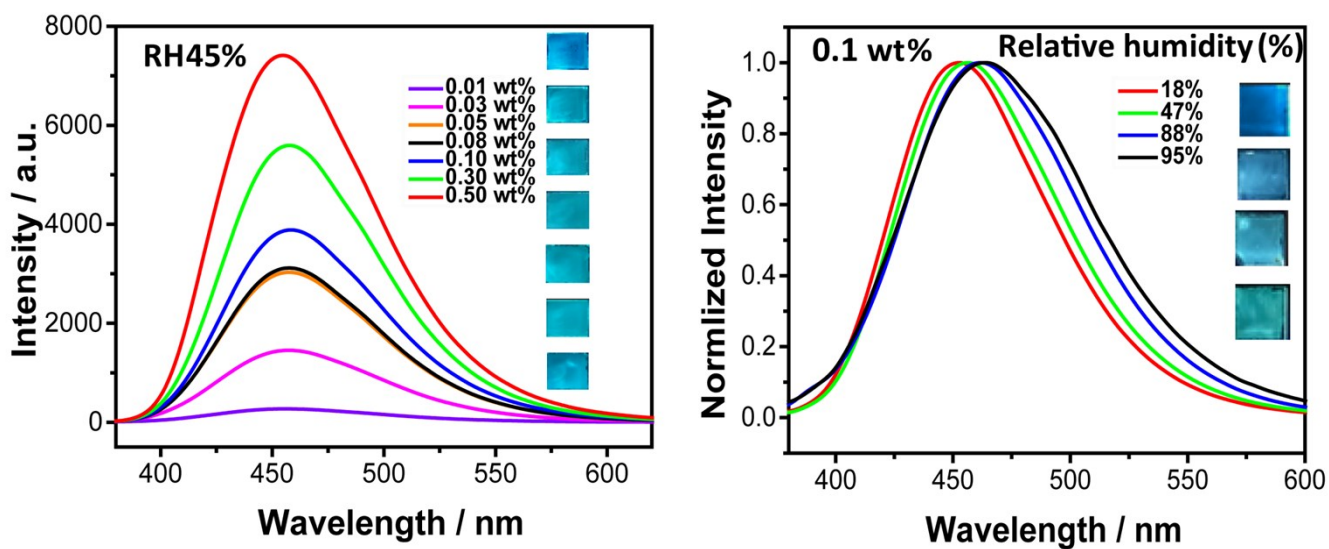

**Fig. S5** The PL spectra of various mass ratios of BPPA/PEG thin films and Zn-BPPA/PEG under different RHs.

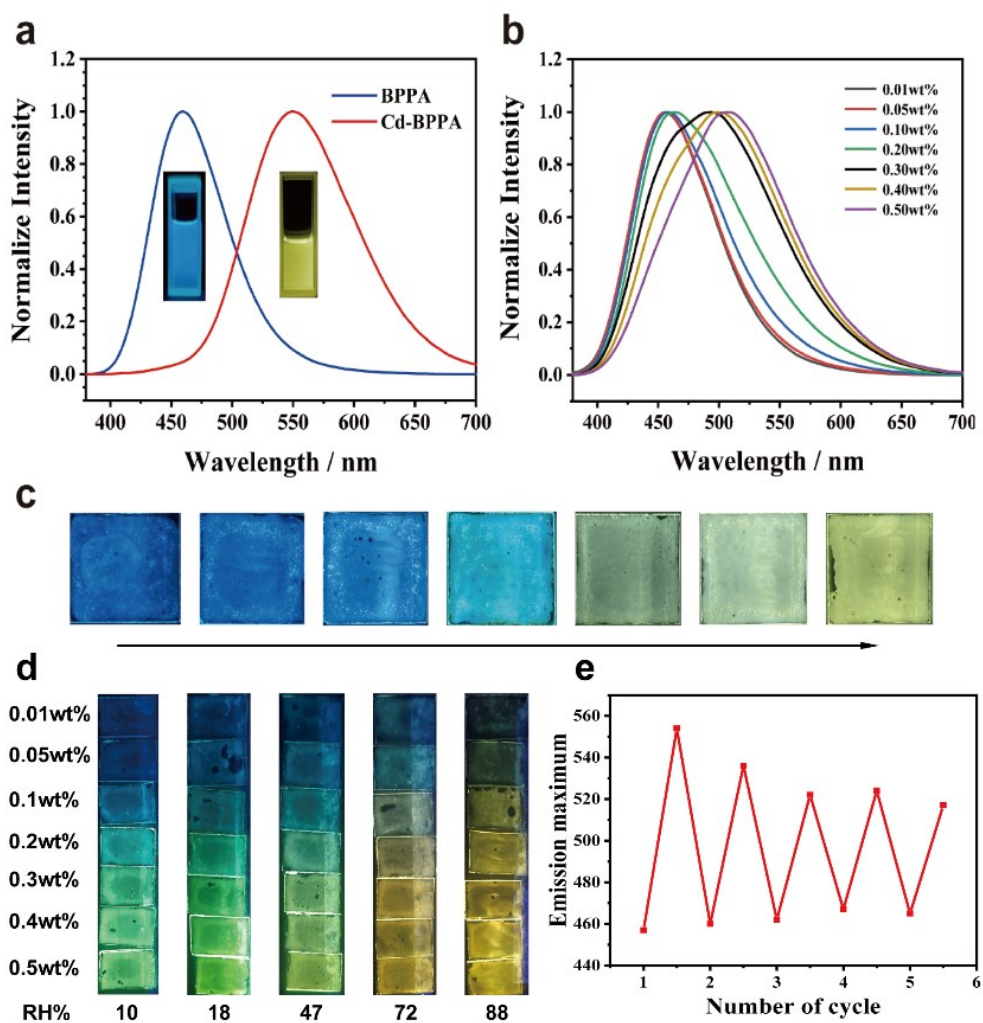

**Fig. S6** (a) PL spectra of BPPA and Zn-BPPA in  $\text{CH}_2\text{Cl}_2$  ( $1 \times 10^{-5}$  mol/L). Insert: Photos of BPPA and Cd-BPPA under UV excitation. (b) PL spectral changes of cd-BPPA/PEG (RH 40%) at different concentrations (from 0.01 wt% to 0.5 wt%). (c) The pictures of Cd-BPPA/PEG film (from 0.01 wt% to 0.5 wt%) under 365 nm UV light irradiation. (d) The pictures of Cd-BPPA/PEG film (from 0.01 wt% to 0.5 wt%) under 365 nm UV light irradiation at various RHs (from 10% to 95 wt%). (e) Five cycles of maximum wavelength variations measured at RH 10-95%.



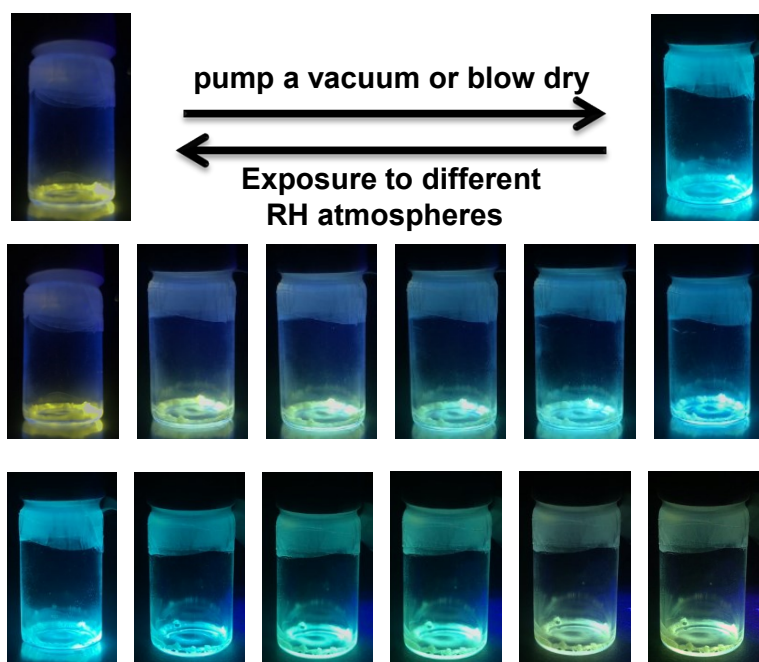

**Fig. S7** the bottle emission color changed induced by the pump to vacuum process.
